# Supplementary material for: Preparation and Characterization of Cardanol-Based Flame Retardant for Enhancing the Flame Retardancy of Epoxy Adhesives
Source: MDPI journal article supplement (doi:10.3390/polym14235205), 2022-11-29
Supplement: s1 [file s1]

# Preparation and Characterization of Cardanol-Based Flame Retardant for Enhancing the Flame Retardancy of Epoxy Adhesives

Won-Ji Lee <sup>1</sup>, Sang-Ho Cha <sup>1,\*</sup> and Do-Hyun Kim <sup>2,\*</sup>

<sup>1</sup> Department of Chemical Engineering, Kyonggi University, 154-42, Gwanggyosan-ro, Yeongtong-gu, Suwon 16227, Republic of Korea

<sup>2</sup> Department of Fire Safety Research, Korea Institute of Civil Engineering and Building Technology, 64, 182Beon-Gil, Mado-Ro, Mado-Myeon, Hwaeong-si 18544, Republic of Korea

\* Correspondence: sanghocha@kgu.ac.kr (S.-H.C.); kimdh@kict.re.kr (D.-H.K.)

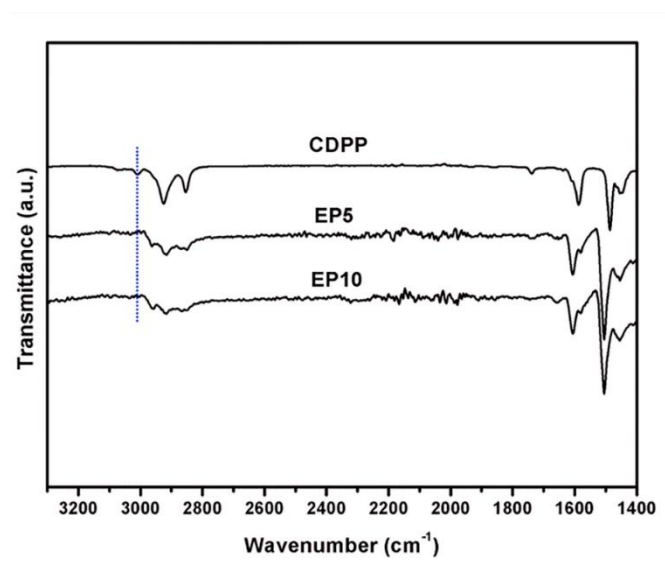

Figure S1. FT-IR spectra of CDPP, EP5, and EP10.

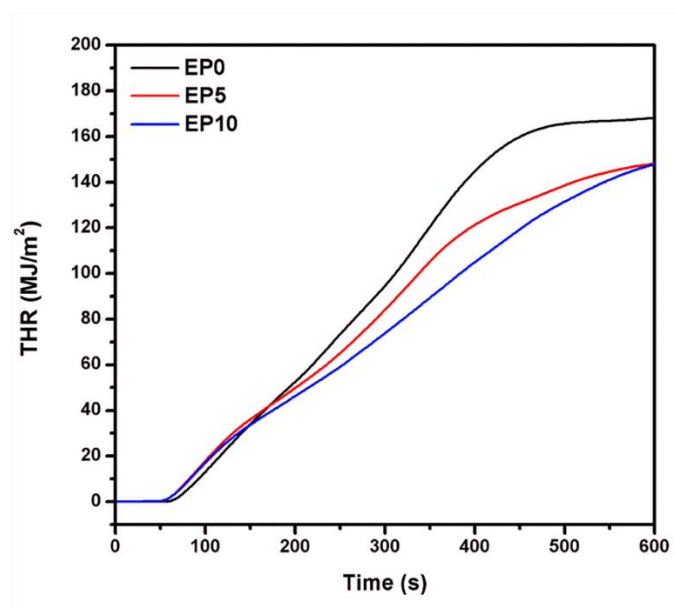

Figure S2. The total heat release (THR) plots of EP series .
